# Supplementary material for: Bioinformatics analysis of the role of CXC ligands in the microenvironment of head and neck tumor
Source: publisher site journal article supplement (doi:10.18632/aging.203269), 2021-07-11
Supplement: Supplementary file [file aging-v13i13-203269-supplementary-material-SD1.pdf]

## SUPPLEMENTARY FIGURES

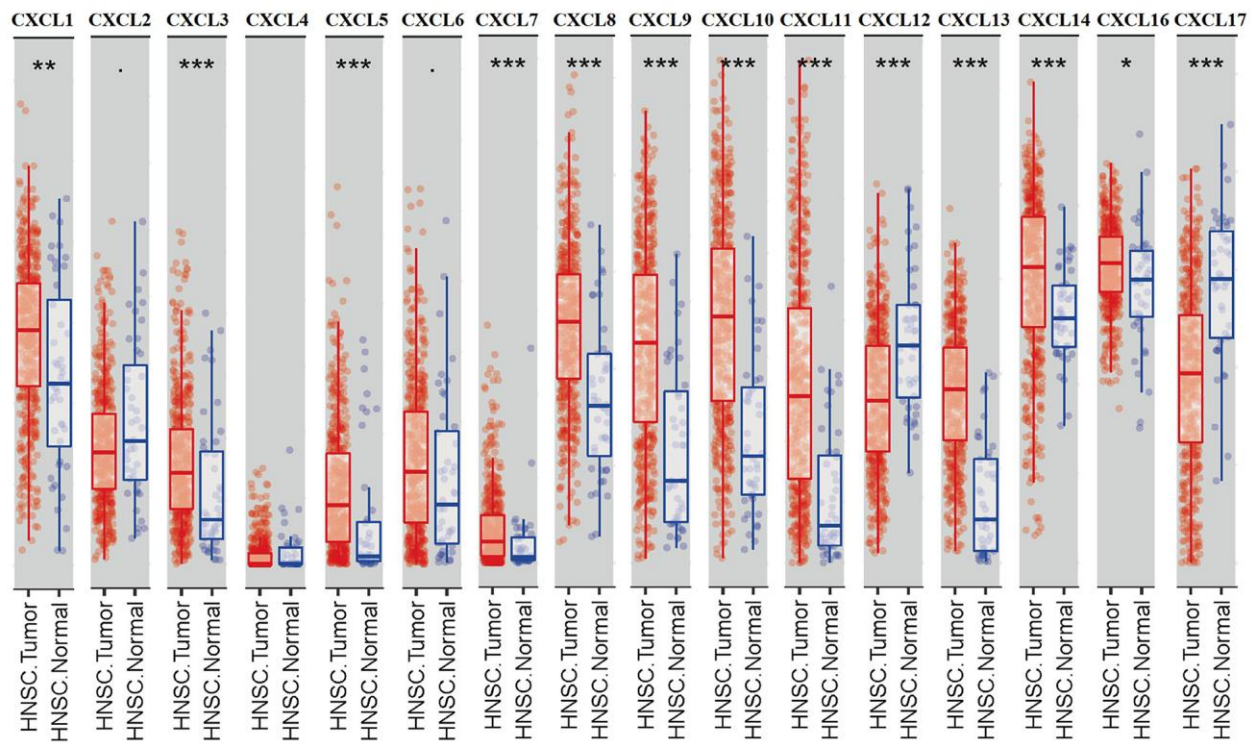

**Supplementary Figure 1. CXC-motif chemokine ligand (CXCL) expression in head and neck squamous cell carcinoma (HNSC).** Differentially expressed CXCLs in HNSC and normal tissues. \* $p < 0.05$ ; \*\* $p < 0.01$ ; \*\*\* $p < 0.001$ .

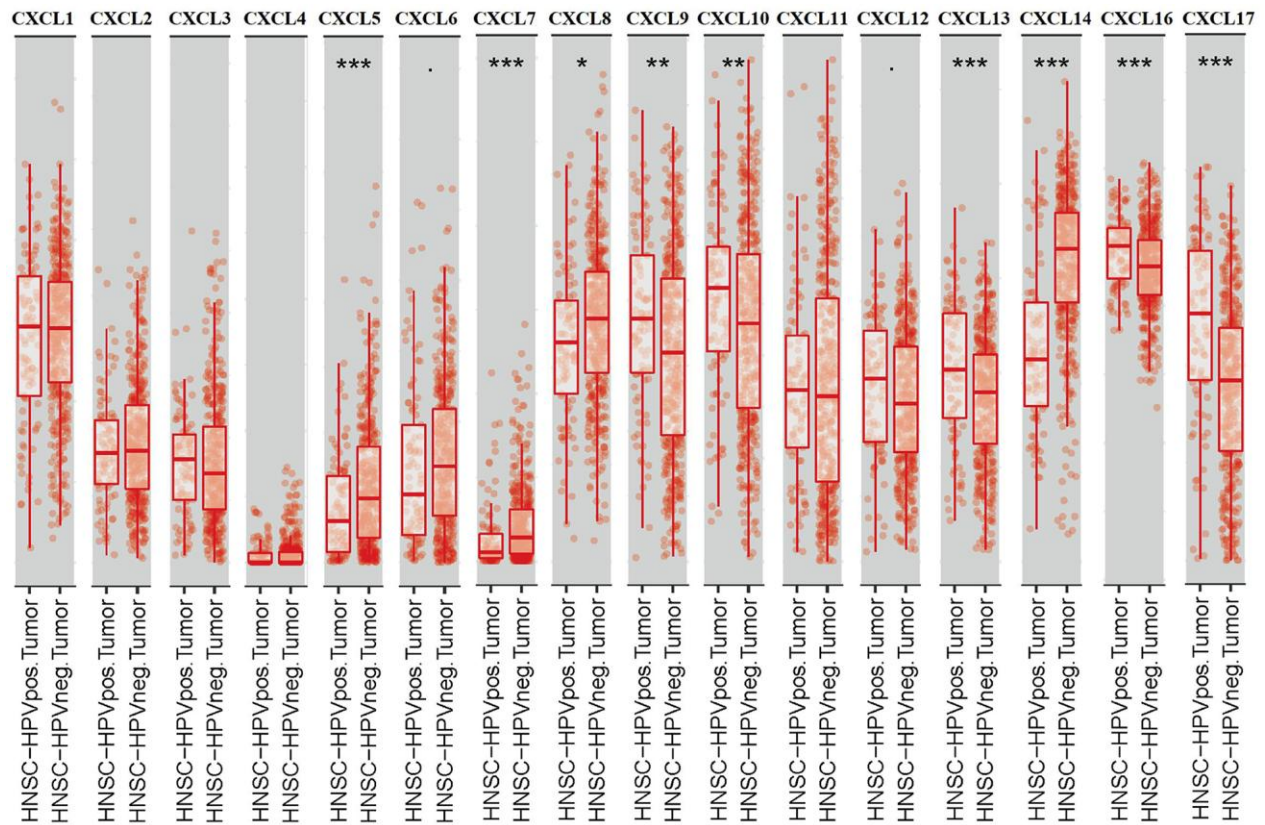

**Supplementary Figure 2. CXCL-motif chemokine ligand (CXCL) expression in HPV-positive and -negative head and neck squamous cell carcinoma (HNSC) patients.** CXCL expression in HPV-positive and -negative HNSC tissues analyzed using the TIMER database. \* $p < 0.05$ ; \*\* $p < 0.01$ ; \*\*\* $p < 0.001$ .

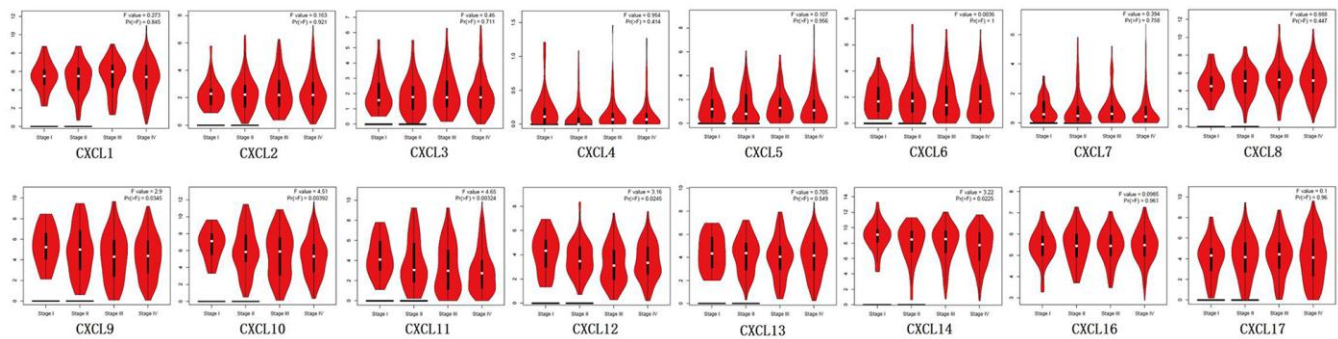

**Supplementary Figure 3. CXCL-motif chemokine ligand (CXCL) expression and tumor stage in head and neck squamous cell carcinoma (HNSC) patients.** CXCL expression at different stages of HNSC was analyzed using the GEPIA database.



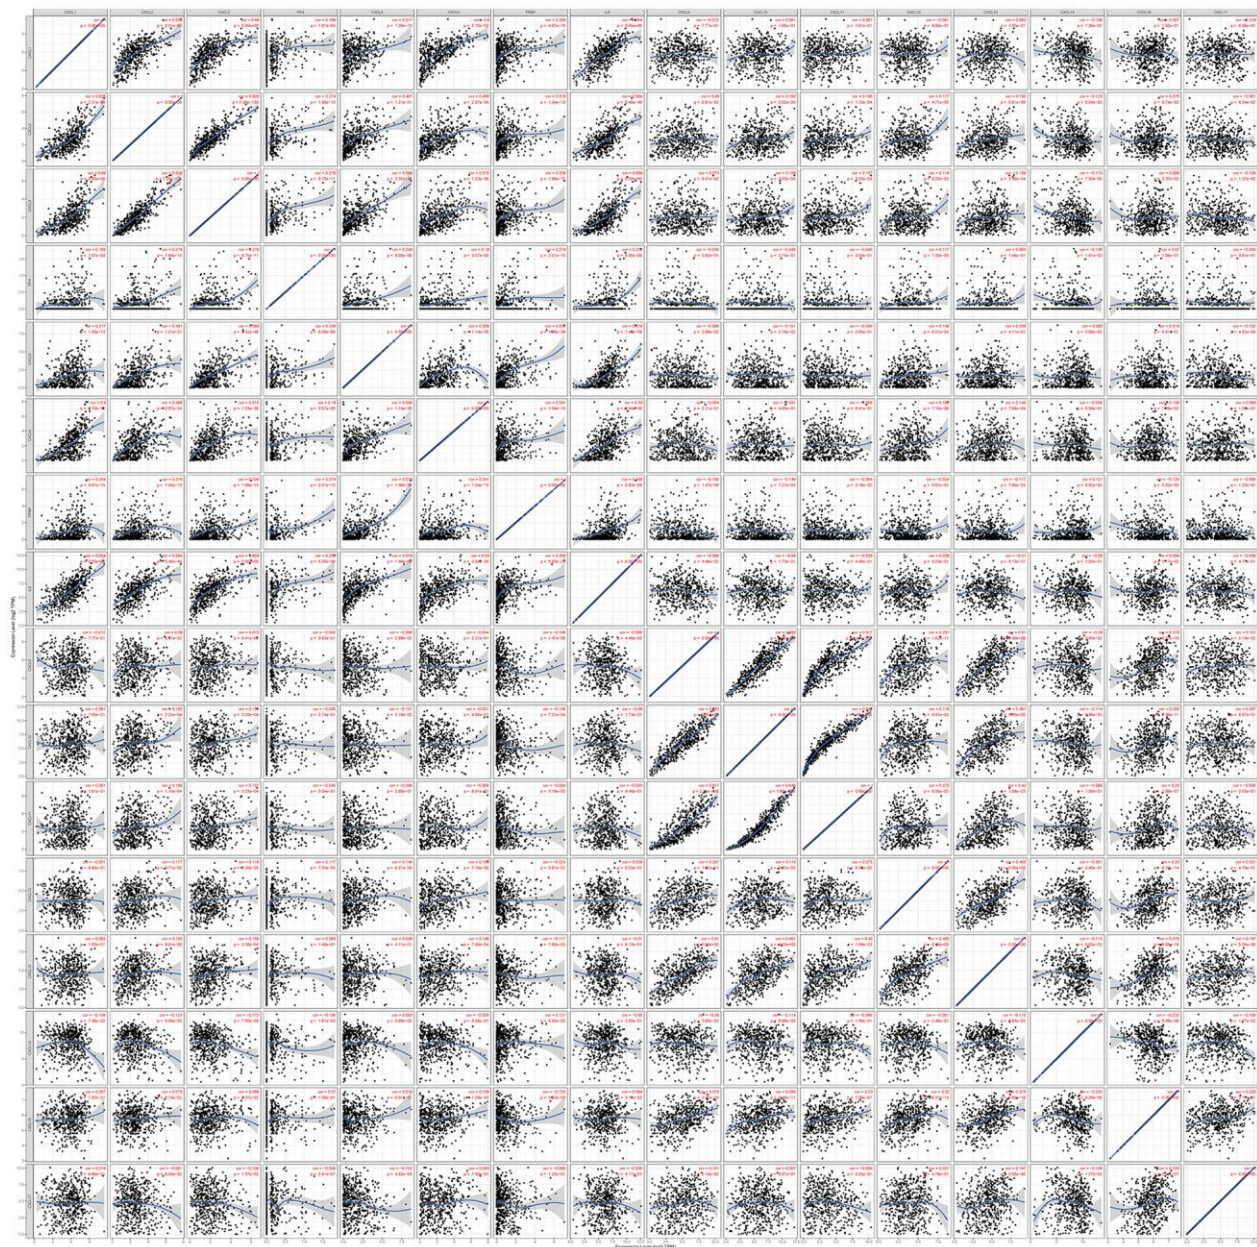

**Supplementary Figure 4. Correlation between CXC-motif chemokine ligands (CXCLs) and immune infiltration in head and neck squamous cell carcinoma (HNSC).** Immune infiltration was analyzed using the TIMER database to verify the correlation among CXCLs in HNSC.





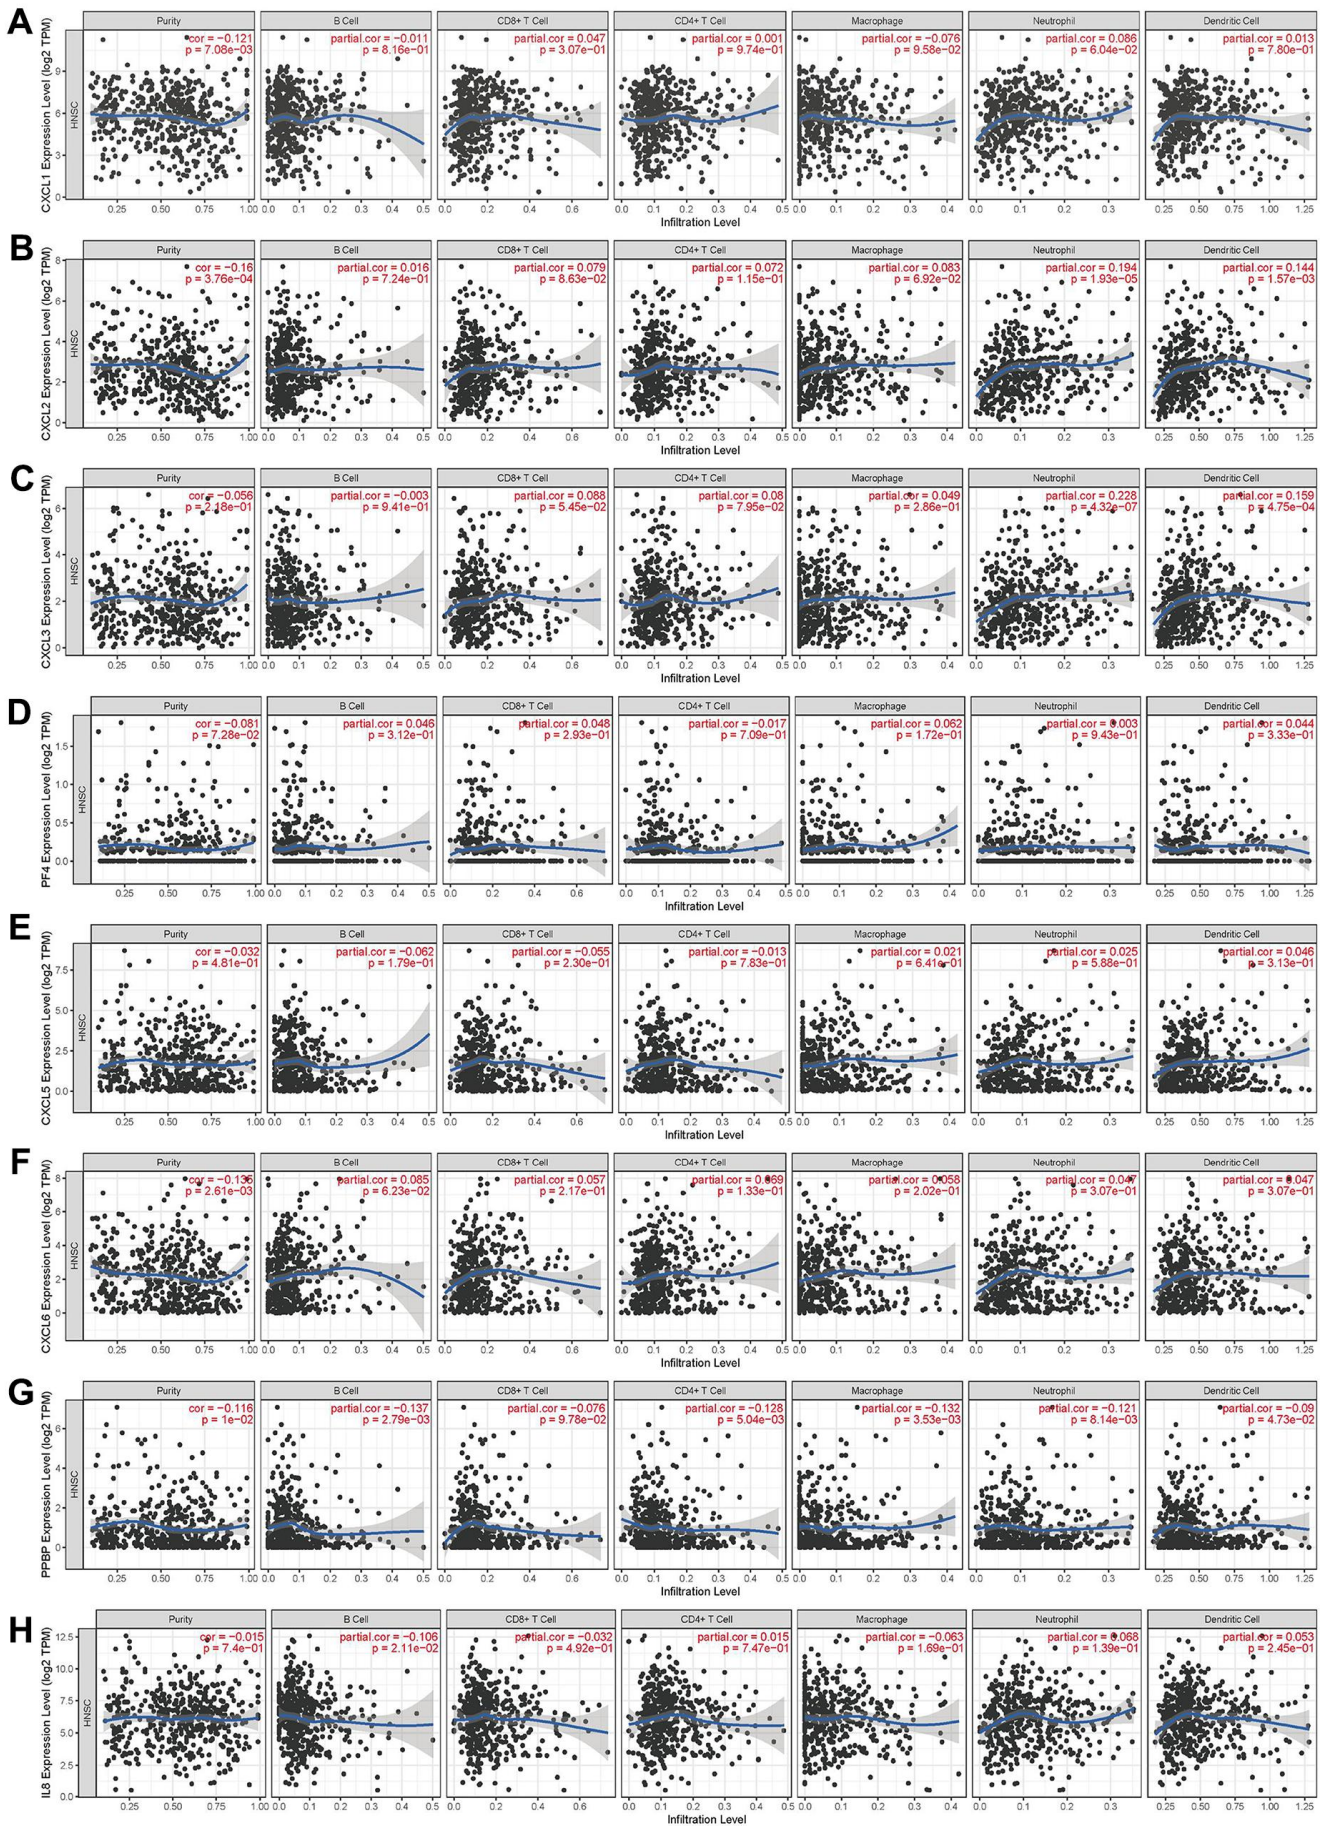



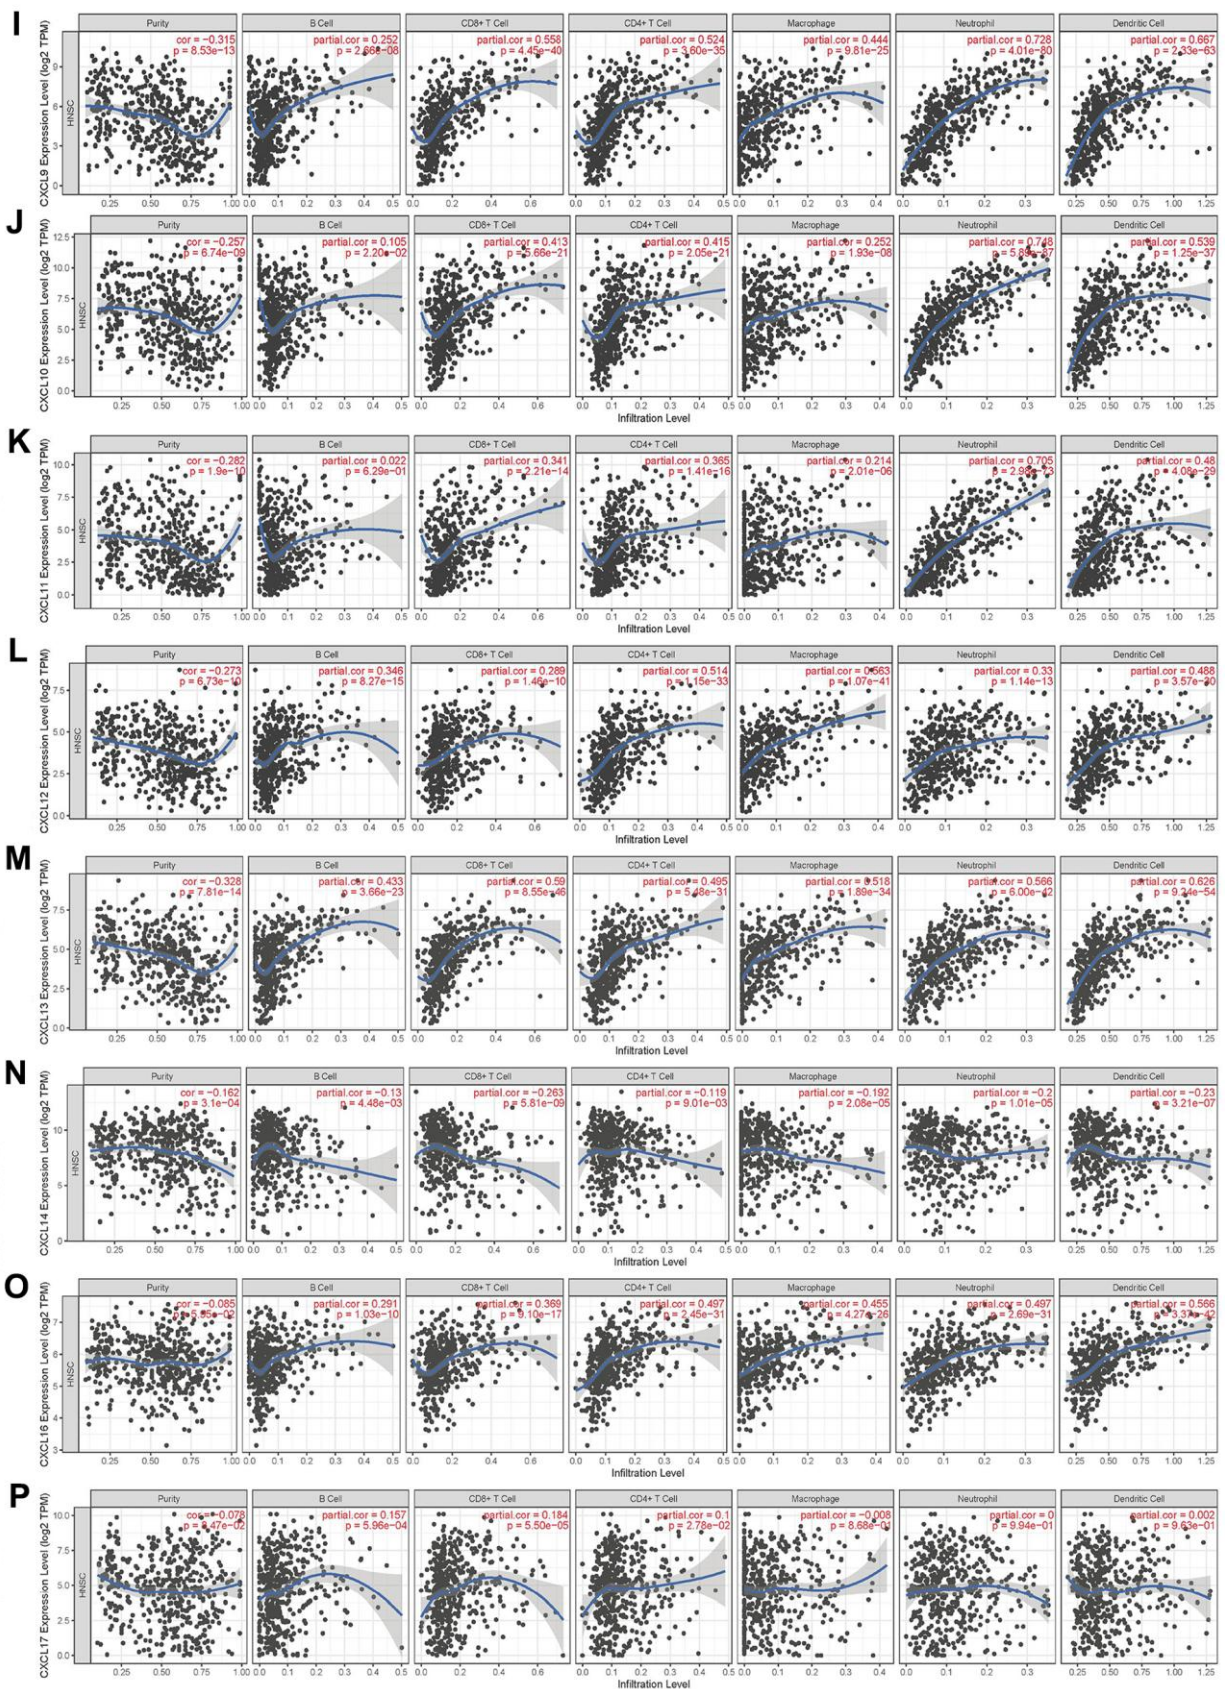

**Supplementary Figure 6. Correlation between different expressed CXCLs and immune cell infiltration. (A–P)** Infiltration of CXCL1-14, CXCL16, CXCL17 in B cell, CD8+ T cell, CD4+ T cell, Macrophage, Neutrophil and Dendritic Cell respectively.

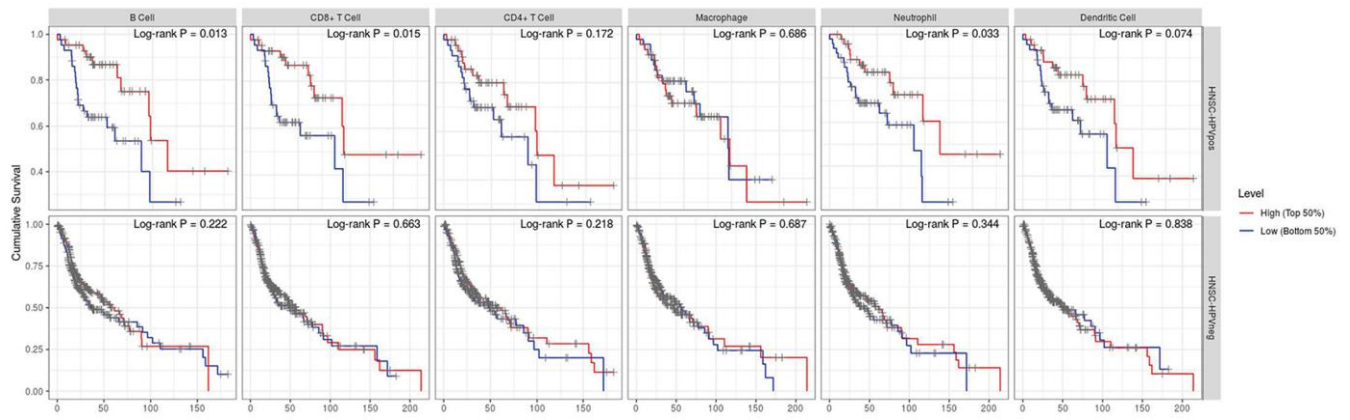

**Supplementary Figure 7. Effect of immune cell proportions on HPV-positive and -negative head and neck squamous cell carcinoma (HNSC).** Upper: HNSC-HPVpos, HPV-positive HNSC patients. Lower: HNSC-HPVneg, HPV-negative HNSC patients.
