# Supplementary material for: Bioinformatics analysis of the role of CXC ligands in the microenvironment of head and neck tumor
Source: publisher site journal article supplement (doi:10.18632/aging.203269), 2021-07-11
Supplement: Supplementary file [file aging-v13i13-203269-supplementary-material-SD2.pdf]

## SUPPLEMENTARY TABLES

**Supplementary Table 1. Analysis of CXC-motif chemokine ligands (CXCLs) and chemokine receptors.**

| <b>Chemokine</b> | <b>Other names</b>                                                                                                         | <b>Official full name</b>       | <b>Receptor</b> |
|------------------|----------------------------------------------------------------------------------------------------------------------------|---------------------------------|-----------------|
| CXCL1            | FSP; GRO1; GROa; MGSA; NAP-3; SCYB1; MGSA-a                                                                                | C-X-C motif chemokine ligand 1  | CXCR1,2         |
| CXCL2            | GRO2; GROb; MIP2; MIP2A; SCYB2; MGSA-b; MIP-2a; CINC-2a                                                                    | C-X-C motif chemokine ligand 2  | CXCR2           |
| CXCL3            | GRO3; GROg; MIP2B; SCYB3; MIP-2b; CINC-2b                                                                                  | C-X-C motif chemokine ligand 3  | CXCR2,3         |
| CXCL4            | PF-4; CXCL4; SCYB4                                                                                                         | Platelet factor 4               | CXCR3           |
| CXCL5            | SCYB5; ENA-78                                                                                                              | C-X-C motif chemokine ligand 5  | CXCR1,2         |
| CXCL6            | GCP2; CKA-3; GCP-2; SCYB6                                                                                                  | C-X-C motif chemokine ligand 6  | CXCR1,2         |
| CXCL7            | PBP; TC1; TC2; TGB; LDGF; MDGF; TGB1; B-TG1; CTAP3; CXCL7; NAP-2; SCYB7; THBGB; LA-PF4; THBGB1; Beta-TG; CTAPIII; CTAP-III | Pro-platelet basic protein      | CXCR2           |
| CXCL8            | IL8; NAF; GCP1; LECT; LUCT; NAP1; GCP-1; LYNAP; MDNCF; MONAP; NAP-1; SCYB8                                                 | C-X-C motif chemokine ligand 8  | CXCR1,2         |
| CXCL9            | CMK; MIG; Humig; SCYB9; crg-10                                                                                             | C-X-C motif chemokine ligand 9  | CXCR3           |
| CXCL10           | C7; IFI10; INP10; IP-10; crg-2; mob-1; SCYB10; gIP-10                                                                      | C-X-C motif chemokine ligand 10 | CXCR3           |
| CXCL11           | IP9; H174; IP-9; b-R1; I-TAC; SCYB11; SCYB9B                                                                               | C-X-C motif chemokine ligand 11 | CXCR3           |
| CXCL12           | IRH; PBSF; SDF1; TLSF; TPAR1; SCYB12                                                                                       | C-X-C motif chemokine ligand 12 | CXCR4,7         |
| CXCL13           | BLC; BCA1; ANGIE; BCA-1; BLR1L; ANGIE2; SCYB13                                                                             | C-X-C motif chemokine ligand 13 | CXCR3,5         |
| CXCL14           | KEC; KS1; BMAC; BRAK; NJAC; MIP2G; MIP-2g; SCYB14                                                                          | C-X-C motif chemokine ligand 14 | -               |
| CXCL16           | SRPSOX; CXCLG16; SR-PSOX                                                                                                   | C-X-C motif chemokine ligand 16 | CXCR6           |
| CXCL17           | DMC; VCC1; Dcip1; VCC-1; UNQ473                                                                                            | C-X-C motif chemokine ligand 17 | -               |

**Supplementary Table 2. CXC-motif chemokine ligand (CXCL) transcript expression in different types of head and neck squamous cell carcinoma (HNSC) and normal tissues.**

|        | Type of HNSC versus normal tissue     | Fold change | p-value  | t-test | Source and/or reference |
|--------|---------------------------------------|-------------|----------|--------|-------------------------|
|        | Tongue Squamous Cell Carcinoma        | 10.936      | 6.96E-11 | 8.880  | Ye Head-Neck [29]       |
|        | Tonsillar Carcinoma                   | 6.417       | 3.94E-5  | 5.494  | Pyeon Multi-cancer [30] |
|        | Tongue Carcinoma                      | 6.078       | 3.62E-7  | 6.027  | Pyeon Multi-cancer [30] |
|        | Head and Neck Squamous Cell Carcinoma | 17.404      | 4.65E-10 | 10.508 | Ginos Head-Neck [31]    |
| CXCL1  | Oral Cavity Squamous Cell Carcinoma   | 3.891       | 1.35E-10 | 8.527  | Peng Head-Neck [32]     |
|        | Tongue Squamous Cell Carcinoma        | 3.800       | 1.65E-6  | 5.181  | Estilo Head-Neck [33]   |
|        | Tongue Squamous Cell Carcinoma        | 2.958       | 1.60E-6  | 5.190  | Talbot Lung [34]        |
| CXCL2  | Head and Neck Squamous Cell Carcinoma | 12.793      | 2.53E-8  | 8.626  | Ginos Head-Neck [31]    |
|        | Head and Neck Squamous Cell Carcinoma | 5.374       | 4.25E-10 | 7.831  | Ginos Head-Neck [31]    |
| CXCL3  | Nasopharyngeal Carcinoma              | 2.328       | 1.90E-5  | 4.750  | Sengupta Head-Neck [35] |
| CXCL5  | Head and Neck Squamous Cell Carcinoma | 16.431      | 7.42E-11 | 8.134  | Ginos Head-Neck [31]    |
|        | Tongue Squamous Cell Carcinoma        | 2.020       | 5.29E-5  | 4.504  | Ye Head-Neck [29]       |
| CXCL6  | Head and Neck Squamous Cell Carcinoma | 2.694       | 4.79E-7  | 5.557  | Ginos Head-Neck [31]    |
|        | Tongue Squamous Cell Carcinoma        | 10.158      | 7.11E-11 | 9.644  | Ye Head-Neck [29]       |
|        | Head and Neck Squamous Cell Carcinoma | 36.405      | 2.12E-15 | 13.407 | Ginos Head-Neck [31]    |
| CXCL8  | Oral Cavity Squamous Cell Carcinoma   | 20.342      | 2.76E-20 | 14.056 | Peng Head-Neck [32]     |
|        | Tongue Carcinoma                      | 6.088       | 1.64E-5  | 5.195  | Pyeon Multi-cancer [30] |
|        | Oral Cavity Squamous Cell Carcinoma   | 16.067      | 1.51E-18 | 12.430 | Peng Head-Neck [32]     |
|        | Nasopharyngeal Carcinoma              | 5.606       | 3.83E-7  | 6.901  | Sengupta Head-Neck [35] |
| CXCL9  | Head and Neck Squamous Cell Carcinoma | 6.976       | 1.81E-10 | 7.860  | Ginos Head-Neck [31]    |
|        | Tongue Squamous Cell Carcinoma        | 6.133       | 1.29E-6  | 5.279  | Estilo Head-Neck [33]   |
|        | Nasopharyngeal Carcinoma              | 7.729       | 7.60E-12 | 11.631 | Sengupta Head-Neck [35] |
|        | Head and Neck Squamous Cell Carcinoma | 6.410       | 1.15E-11 | 8.488  | Ginos Head-Neck [31]    |
|        | Oral Cavity Squamous Cell Carcinoma   | 19.340      | 6.43E-16 | 12.378 | Peng Head-Neck [32]     |
| CXCL10 | Tongue Squamous Cell Carcinoma        | 9.441       | 1.77E-7  | 5.885  | Estilo Head-Neck [33]   |
|        | Tongue Squamous Cell Carcinoma        | 3.073       | 1.28E-6  | 5.738  | Talbot Lung [34]        |
|        | Nasopharyngeal Carcinoma              | 14.625      | 5.58E-10 | 10.466 | Sengupta Head-Neck [35] |
|        | Oral Cavity Squamous Cell Carcinoma   | 20.050      | 4.64E-17 | 11.661 | Peng Head-Neck [32]     |
| CXCL11 | Head and Neck Squamous Cell Carcinoma | 6.635       | 3.79E-11 | 8.164  | Ginos Head -Neck [31]   |
|        | Tongue Squamous Cell Carcinoma        | 7.827       | 4.21E-7  | 5.658  | Estilo Head-Neck [33]   |
| CXCL12 | Oral Cavity Squamous Cell Carcinoma   | -3.001      | 2.34E-6  | -5.199 | Peng Head-Neck [32]     |
| CXCL13 | Head and Neck Squamous Cell Carcinoma | 67.011      | 3.47E-16 | 14.825 | Ginos Head -Neck [31]   |
|        | Nasopharyngeal Carcinoma              | -4.780      | 1.53E-8  | -7.924 | Sengupta Head-Neck [35] |
| CXCL17 | Oral Cavity Squamous Cell Carcinoma   | -3.444      | 1.14E-13 | -8.939 | Peng Head-Neck [32]     |

**Supplementary Table 3. Top 50 similar CXC-motif chemokine ligand (CXCL)-related genes detected.**

| <b>Gene symbol</b> | <b>Gene ID</b>     | <b>PCC</b> |
|--------------------|--------------------|------------|
| GBP5               | ENSG00000154451.14 | 0.77       |
| EBF1               | ENSG00000164330.16 | 0.77       |
| CDH5               | ENSG00000179776.17 | 0.73       |
| FGF7               | ENSG00000140285.9  | 0.73       |
| BICC1              | ENSG00000122870.11 | 0.72       |
| CD34               | ENSG00000174059.16 | 0.72       |
| COL15A1            | ENSG00000204291.10 | 0.72       |
| CXCR2P1            | ENSG00000229754.1  | 0.72       |
| JAM2               | ENSG00000154721.14 | 0.72       |
| WARS               | ENSG00000140105.17 | 0.72       |
| SNED1              | ENSG00000162804.13 | 0.71       |
| ZEB2               | ENSG00000169554.16 | 0.71       |
| CD93               | ENSG00000125810.9  | 0.70       |
| CXorf36            | ENSG00000147113.16 | 0.70       |
| FBLN5              | ENSG00000140092.14 | 0.70       |
| GBP1               | ENSG00000117228.9  | 0.70       |
| IL18BP             | ENSG00000137496.17 | 0.70       |
| PECAM1             | ENSG00000261371.5  | 0.70       |
| ABCC9              | ENSG00000069431.10 | 0.69       |
| ARHGEF15           | ENSG00000198844.10 | 0.69       |
| CNRIP1             | ENSG00000119865.8  | 0.69       |
| FBN1               | ENSG00000166147.13 | 0.69       |
| FYN                | ENSG00000010810.17 | 0.69       |
| GPIHBP1            | ENSG00000277494.1  | 0.69       |
| LGALS17A           | ENSG00000226025.9  | 0.69       |
| PCDH12             | ENSG00000113555.5  | 0.69       |
| PPBP               | ENSG00000163736.3  | 0.69       |
| STARD8             | ENSG00000130052.13 | 0.69       |
| ZMYND15            | ENSG00000141497.13 | 0.69       |
| ADGRL4             | ENSG00000162618.12 | 0.68       |
| BATF2              | ENSG00000168062.9  | 0.68       |
| COL3A1             | ENSG00000168542.12 | 0.68       |
| ECM2               | ENSG00000106823.12 | 0.68       |
| ECSCR              | ENSG00000249751.3  | 0.68       |
| FZD4               | ENSG00000174804.3  | 0.68       |
| LAP3               | ENSG00000002549.12 | 0.68       |
| MYCT1              | ENSG00000120279.6  | 0.68       |
| S1PR1              | ENSG00000170989.8  | 0.68       |
| TIE1               | ENSG00000066056.13 | 0.68       |
| RP11               | ENSG00000269998.1  | 0.68       |
| COLEC12            | ENSG00000158270.11 | 0.67       |
| DCHS1              | ENSG00000166341.7  | 0.67       |
| DDR2               | ENSG00000162733.16 | 0.67       |
| FIBIN              | ENSG00000176971.3  | 0.67       |
| LDB2               | ENSG00000169744.12 | 0.67       |

|         |                    |      |
|---------|--------------------|------|
| TMEM119 | ENSG00000183160.8  | 0.67 |
| ZCCHC24 | ENSG00000165424.6  | 0.67 |
| CH507   | ENSG00000280019.1  | 0.67 |
| IFITM1  | ENSG00000185885.15 | 0.67 |
| A2M     | ENSG00000175899.14 | 0.66 |

PCC, Pearson correlation coefficient.

**Supplementary Table 4. CXC-motif chemokine ligand (CXCL) expression in 22 immune cells in HNSC\_GSE103322.**

| Gene   | Cell type (major lineage) | Cell type (minor lineage) | Log2 fold change |
|--------|---------------------------|---------------------------|------------------|
| CXCL2  | CD4Tconv                  | CD4Tn                     | -1.46            |
|        | CD8Tex                    | CD8Tex                    | -1.48            |
|        | CD8T                      | CD8Tcm                    | -1.43            |
|        | Mono/macro                | M1                        | 1.49             |
|        | Plasma                    | Plasma                    | -1.44            |
| CXCL3  | Mono/macro                | M1                        | 1.58             |
| CXCL8  | Mono/macro                | M1                        | 1.95             |
| CXCL10 | Mono/macro                | M1                        | 1.38             |
| CXCL12 | CD4Tconv                  | CD4Tn                     | -1.18            |
|        | CD8Tex                    | CD8Tex                    | -1.21            |
|        | CD8T                      | CD8Tcm                    | -1.2             |
|        | Plasma                    | Plasma                    | -1.16            |
| CXCL13 | CD8Tex                    | CD8Tex                    | 2.05             |
|        | CD8T                      | CD8Tcm                    | 1.39             |
| CXCL14 | CD4Tconv                  | CD4Tn                     | -2.56            |
|        | CD4Tconv                  | CD4Tn                     | -2.31            |
|        | CD8Tex                    | CD8Tex                    | -2.56            |
|        | CD8T                      | CD8Tcm                    | -2.58            |
|        | Mast                      | Mast                      | -1.73            |
|        | Mono/macro                | M1                        | -2.36            |
|        | Plasma                    | Plasma                    | -2.45            |
| CXCL16 | Mono/macro                | M1                        | 1.41             |

CD4Tconv, conventional T-cells; CD4Tn, naive T cells; CD8Tex, exhausted CD8(+) T cells; CD8Tcm, central memory CD8(+) T cells; Mono/macro, monocytes/macrophages; M1, classically activated macrophages.

**Supplementary Table 5. CXC-motif chemokine ligand (CXCL) expression in 40 immune cells in HNSC\_GSE139324.**

| Gene   | Cell type (major lineage) | Cell type (minor lineage) | Log2 fold change |
|--------|---------------------------|---------------------------|------------------|
| CXCL1  | Mono/macro                | Monocyte                  | 1.91             |
|        | Mono/macro                | M2                        | 1.13             |
| CXCL2  | Mono/macro                | Monocyte                  | 2.77             |
|        | Mono/macro                | M2                        | 1.18             |
| CXCL3  | Mono/macro                | Monocyte                  | 2.7              |
|        | Mono/macro                | M2                        | 1.16             |
| CXCL8  | B                         | B                         | -1.41            |
|        | B                         | B                         | -1.48            |
|        | B                         | B                         | -1.46            |
|        | CD4Tconv                  | CD4Tn                     | -1.37            |
|        | CD4Tconv                  | CD4Tn                     | -1.59            |
|        | CD4Tconv                  | Tfh                       | -1.1             |
|        | CD8T                      | CD8Teff                   | -1.48            |
|        | CD8T                      | CD8Tem                    | -1.49            |
|        | CD8Tex                    | CD8Tex                    | -1.13            |
|        | CD8T                      | CD8Tn                     | -1.53            |
| CXCL9  | Mono/macro                | Monocyte                  | 3.62             |
|        | Mono/macro                | M1                        | -1.25            |
|        | Mono/macro                | M2                        | 1.25             |
|        | NK                        | NK                        | -1.48            |
| CXCL9  | Mono/macro                | M2                        | 1.76             |
|        | Mono/macro                | cDC2                      | 1.13             |
| CXCL10 | Mono/macro                | Monocyte                  | 2.27             |
|        | Mono/macro                | M2                        | 1.71             |
| CXCL13 | B                         | B                         | -1.24            |
|        | B                         | B                         | -1.22            |
|        | B                         | B                         | -1.21            |
|        | CD4Tconv                  | CD4Tn                     | -1.23            |
|        | CD4Tconv                  | CD4Tn                     | -1.35            |
|        | CD8T                      | CD8Teff                   | -1.28            |
|        | CD8Tex                    | CD8Tex                    | 1.45             |
|        | CD8T                      | CD8Tem                    | -1.29            |
|        | CD8T                      | CD8Tn                     | -1.3             |
|        | Mono/macro                | Monocyte                  | -1.23            |
| CXCL16 | Mono/macro                | Monocyte                  | -1.32            |
|        | Mono/macro                | M1                        | -1.29            |
|        | NK                        | NK                        | -1.3             |
|        | Tprolif                   | Tprolif                   | 1.6              |
|        | Treg                      | Treg                      | 1.91             |
|        | Mono/Macro                | M2                        | 1.23             |

Mono/macro, monocytes/macrophages; M1, classically activated macrophages; M2, alternatively activated macrophages; B, B cells; CD4Tconv, CD4(+) conventional T-cells; CD4Tn, CD4(+) naive T cells; Tfh, T follicular helper cells; CD8Teff, CD8(+) effector T cells; CD8Tem, CD8(+) T effector memory cells; CD8Tex, exhausted CD8(+) T cells; CD8Tn, CD8(+) naive T cells; NK, natural killer cells; cDC2, conventional dendritic cells type 2; Tprolif, proliferating T cells; Treg, regulatory T cells.

**Supplementary Table 6. CXC-motif chemokine ligands (CXCLs) and immune cell infiltration in head and neck squamous cell carcinoma (HNSC) patients.**

|        | Purity |          | B cells |          | CD8+ T cells |          | CD4+ T cells |          | Macrophages |          | Neutrophils |          | Dendritic cells |          |
|--------|--------|----------|---------|----------|--------------|----------|--------------|----------|-------------|----------|-------------|----------|-----------------|----------|
|        | cor    | p-value  | cor     | p-value  | cor          | p-value  | cor          | p-value  | cor         | p-value  | cor         | p-value  | cor             | p-value  |
| CXCL1  | -0.121 | 7.08E-03 | -0.011  | 8.16E-01 | 0.047        | 3.07E-01 | 0.001        | 9.74E-01 | -0.076      | 9.58E-02 | 0.086       | 6.04E-02 | 0.013           | 7.80E-01 |
| CXCL2  | -0.16  | 3.76E-04 | 0.016   | 7.24E-01 | 0.079        | 8.63E-02 | 0.072        | 1.15E-01 | 0.083       | 6.92E-02 | 0.194       | 1.93E-05 | 0.144           | 1.57E-03 |
| CXCL3  | -0.056 | 2.18E-01 | -0.003  | 9.41E-01 | 0.088        | 5.45E-02 | 0.08         | 7.95E-02 | 0.049       | 2.86E-01 | 0.228       | 4.32E-07 | 0.159           | 4.75E-04 |
| CXCL4  | -0.081 | 7.28E-02 | 0.046   | 3.12E-01 | 0.048        | 2.93E-01 | -0.017       | 7.09E-01 | 0.062       | 1.72E-01 | 0.003       | 9.43E-01 | 0.044           | 3.33E-01 |
| CXCL5  | -0.032 | 4.81E-01 | -0.062  | 1.79E-01 | -0.055       | 2.30E-01 | -0.013       | 7.83E-01 | 0.021       | 6.41E-01 | 0.025       | 5.88E-01 | 0.048           | 3.13E-01 |
| CXCL6  | -0.135 | 2.61E-03 | 0.085   | 6.23E-02 | 0.057        | 2.17E-01 | 0.069        | 1.33E-01 | 0.058       | 2.02E-01 | 0.047       | 3.07E-01 | 0.047           | 3.07E-01 |
| CXCL7  | -0.116 | 1.00E-02 | -0.137  | 2.79E-03 | -0.076       | 9.78E-02 | -0.128       | 5.04E-03 | -0.132      | 3.53E-03 | -0.121      | 8.14E-03 | -0.09           | 4.73E-02 |
| CXCL8  | -0.015 | 7.40E-01 | -0.106  | 2.11E-02 | -0.032       | 4.92E-01 | 0.015        | 7.47E-01 | -0.063      | 1.69E-01 | 0.068       | 1.39E-01 | 0.053           | 2.45E-01 |
| CXCL9  | -0.315 | 8.53E-13 | 0.252   | 2.66E-08 | 0.558        | 4.45E-40 | 0.524        | 3.60E-35 | 0.444       | 9.81E-25 | 0.728       | 4.01E-80 | 0.667           | 2.33E-63 |
| CXCL10 | -0.257 | 6.74E-09 | 0.105   | 2.20E-02 | 0.413        | 5.66E-21 | 0.415        | 2.05E-21 | 0.252       | 1.93E-08 | 0.748       | 5.89E-87 | 0.539           | 1.25E-37 |
| CXCL11 | -0.282 | 1.90E-10 | 0.022   | 6.29E-01 | 0.341        | 2.21E-14 | 0.365        | 1.41E-16 | 0.214       | 2.01E-06 | 0.705       | 2.98E-73 | 0.48            | 4.08E-29 |
| CXCL12 | -0.273 | 6.73E-10 | 0.346   | 8.27E-15 | 0.289        | 1.46E-10 | 0.514        | 1.15E-33 | 0.563       | 1.07E-41 | 0.33        | 1.14E-13 | 0.488           | 3.57E-30 |
| CXCL13 | -0.328 | 7.81E-14 | 0.433   | 3.66E-23 | 0.59         | 8.55E-46 | 0.495        | 5.48E-31 | 0.518       | 1.89E-34 | 0.566       | 6.00E-42 | 0.626           | 9.24E-54 |
| CXCL14 | -0.162 | 3.10E-04 | -0.13   | 4.48E-03 | -0.263       | 5.81E-09 | -0.119       | 9.01E-03 | -0.192      | 2.08E-05 | -0.2        | 1.10E-05 | -0.23           | 3.21E-07 |
| CXCL16 | -0.085 | 5.95E-02 | 0.291   | 1.03E-10 | 0.369        | 9.10E-17 | 0.497        | 2.45E-31 | 0.455       | 4.27E-26 | 0.497       | 2.69E-31 | 0.566           | 3.37E-42 |
| CXCL17 | -0.078 | 8.47E-02 | 0.157   | 5.96E-04 | 0.184        | 5.50E-05 | 0.1          | 2.78E-02 | -0.008      | 8.68E-01 | 0           | 9.94E-01 | 0.002           | 9.63E-01 |

cor, correlation.
